# Supplementary material for: Presence of Halogenated Polycyclic Aromatic Hydrocarbons in Milk Powder and the Consequence to Human Health
Source: MDPI journal article supplement (doi:10.3390/toxics10100621), 2022-10-19
Supplement: s1 [file s1]

## Supplementary information

# Presence of Halogenated Polycyclic Aromatic Hydrocarbons in Milk Powder and the Consequence to Human Health

Prasun Goswami <sup>1</sup>, Anura Upasanta-Kumara Wickrama-Arachchige <sup>2</sup>, Momoka Yamada <sup>3</sup>, Takeshi Ohura <sup>3,\*</sup> and Keerthi S. Guruge <sup>4,5,\*</sup>

<sup>1</sup> Atal Centre for Ocean Science and Technology for Islands, ESSO-National Institute of Ocean Technology, Port Blair 744103, Andaman and Nicobar Islands, India

<sup>2</sup> Faculty of Fisheries and Ocean Sciences, Ocean University of Sri Lanka, Tangalle HB 82200, Sri Lanka

<sup>3</sup> Faculty of Agriculture, Meijo University, Nagoya 468-8502, Japan

<sup>4</sup> National Institute of Animal Health, National Agriculture and Food Research Organization, Tsukuba 305-0856, Japan

<sup>5</sup> Graduate School of Life and Environmental Sciences, Osaka Metropolitan University, Osaka 598-8531, Japan

\* Correspondence: ohura@meijo-u.ac.jp (T.O.); guruge@affrc.go.jp (K.S.G.)

Table S1. Details of milk powder samples

| Country   | Sample no | Type                    | fat % |
|-----------|-----------|-------------------------|-------|
| Japan     | JP-1      | Adult                   | 1.8   |
|           | JP-2      | Baby formula            | 0.9   |
|           | JP-3      | Low fat creaming powder | <0.1  |
|           | JP-4      | Creaming powder         | 1.6   |
| Sri Lanka | SL-1      | Full cream, imported    | 13    |
|           | SL-2      | Full cream, imported    | 19    |
|           | SL-3      | Full cream, local       | 6.2   |
|           | SL-4      | Full cream, imported    | 17    |

Table S2: Summary of compounds of interest, their corresponding TEF or REP values, detection frequencies, and concentrations (ng/g d.w.) in milk powder obtained from Sri Lanka and Japan.

| Congener                                    | Acronym    | # of rings | TEF/REP | Sri Lanka      |      |      | Japan          |                       |                       |
|---------------------------------------------|------------|------------|---------|----------------|------|------|----------------|-----------------------|-----------------------|
|                                             |            |            |         | % of detection | Mean | SD   | % of Detection | Mean                  | SD                    |
| PAH                                         |            |            |         |                |      |      |                |                       |                       |
| Naphthalene                                 | Nap        | 2          | 0.001   | -              | -    | -    | -              | -                     | -                     |
| Acenaphtylene                               | Acy        | 3          | 0.001   | -              | -    | -    | -              | -                     | -                     |
| Acenaphthene                                | Ace        | 3          | 0.001   | -              | -    | -    | 50             | 0.10                  | 0.11                  |
| Fluorene                                    | Fl         | 3          | 0.001   | -              | -    | -    | 25             | 0.19                  | 0.39                  |
| Phenanthrene                                | Phe        | 3          | 0.001   | -              | -    | -    | 50             | 1.35                  | 2.46                  |
| Anthracene                                  | Ant        | 3          | 0.01    | -              | -    | -    | 25             | 0.32                  | 0.64                  |
| Fluoranthene                                | Fluor      | 4          | 0.001   | -              | -    | -    | 50             | 2.02                  | 2.95                  |
| Pyrene                                      | Py         | 4          | 0.001   | -              | -    | -    | 50             | 1.89                  | 2.52                  |
| Benz[c]phenanthrene                         | BcPhe      | 4          |         | -              | -    | -    | 50             | 0.09                  | 0.11                  |
| Benz[a]anthracene                           | BaA        | 4          | 0.1     | -              | -    | -    | 50             | 0.30                  | 0.37                  |
| Chrysene                                    | Chry       | 4          | 0.01    | -              | -    | -    | 50             | 0.28                  | 0.35                  |
| 7,12-Dimethylbenz[a]anthracene              | 7,12-DMBaA | 4          |         | 25             | 0.01 | 0.02 | 25             | 1.91×10 <sup>-4</sup> | 3.81×10 <sup>-4</sup> |
| Benzo[b]fluoranthene                        | BbF        | 5          | 0.1     | -              | -    | -    | 75             | 0.13                  | 0.18                  |
| Benzo[j]fluoranthene + Benzo[k]fluoranthene | BjF+BkF    | 5          | 0.1     | -              | -    | -    | 75             | 0.06                  | 0.07                  |
| Benzo[e]pyrene                              | BeP        | 5          |         | -              | -    | -    | 75             | 0.14                  | 0.18                  |
| Benzo[a]pyrene                              | BaP        | 5          | 1       | -              | -    | -    | 75             | 0.16                  | 0.21                  |

|                                                       |                            |   |      |     |                       |                       |    |                       |                       |
|-------------------------------------------------------|----------------------------|---|------|-----|-----------------------|-----------------------|----|-----------------------|-----------------------|
| 3-Methylcholanthrene                                  | 3-MECA                     | 5 |      | 25  | 0.02                  | 0.04                  | 75 | 1.57×10 <sup>-3</sup> | 1.70×10 <sup>-3</sup> |
| Indeno[1,2,3-cd]pyrene                                | IP                         | 6 | 0.1  | -   | -                     | -                     | 75 | 0.21                  | 0.18                  |
| Dibenz[a,h]anthracene                                 | DBahA                      | 5 | 1    | -   | -                     | -                     | 75 | 0.02                  | 0.02                  |
| Benzo[g,h,i]perylene                                  | BghiP                      | 6 | 0.01 | -   | -                     | -                     | 75 | 0.13                  | 0.09                  |
| Dibenzo[a,l]pyrene                                    | DBalP                      | 6 |      | 50  | 3.37×10 <sup>-3</sup> | 5.75×10 <sup>-3</sup> | 50 | 0.03                  | 0.04                  |
| Dibenzo[a,i]pyrene                                    | DBaiP                      | 6 |      | -   | -                     | -                     | -  | -                     | -                     |
| Dibenzo[a,h]pyrene                                    | DBahP                      | 6 |      | -   | -                     | -                     | -  | -                     | -                     |
| <b>CIPAH</b>                                          |                            |   |      |     |                       |                       |    |                       |                       |
| 9-chlorofluorene                                      | 9-ClFlu                    | 3 |      | -   | -                     | -                     | -  | -                     | -                     |
| 9-chlorophenanthrene                                  | 9-ClPhe                    | 3 | 0.03 | 25  | 0.01                  | 0.03                  | 25 | 2.09×10 <sup>-3</sup> | 4.18×10 <sup>-3</sup> |
| 2-chloroanthracene +<br>1-chloroanthracene            | 2-ClAnt+1-<br>ClAnt        | 3 | 0.1  | 50  | 5.89×10 <sup>-4</sup> | 9.15×10 <sup>-4</sup> | 50 | 1.96×10 <sup>-3</sup> | 2.57×10 <sup>-3</sup> |
| 9-chloroanthracene                                    | 9-ClAnt                    | 3 | 0.03 | -   | -                     | -                     | 50 | 4.71×10 <sup>-3</sup> | 7.05×10 <sup>-3</sup> |
| 3,9-dichlorophenanthrene                              | 3,9-Cl2Phe                 | 3 | 0.32 | 50  | 2.59×10 <sup>-3</sup> | 4.14×10 <sup>-3</sup> | 75 | 1.21×10 <sup>-3</sup> | 1.41×10 <sup>-3</sup> |
| 9,10-dichloroanthracene +<br>1,9-dichlorophenanthrene | 9,10-Cl2Ant<br>+1,9-Cl2Phe | 3 | 0.2  | 100 | 4.97×10 <sup>-3</sup> | 4.01×10 <sup>-3</sup> | 75 | 5.79×10 <sup>-4</sup> | 7.32×10 <sup>-4</sup> |
| 9,10-<br>dichlorophenanthrene                         | 9,10-Cl2Phe                | 3 | 0.16 | 25  | 5.51×10 <sup>-3</sup> | 1.10×10 <sup>-2</sup> | 50 | 2.02×10 <sup>-3</sup> | 2.47×10 <sup>-3</sup> |

|                                |               |   |      |     |                       |                       |    |                       |                       |
|--------------------------------|---------------|---|------|-----|-----------------------|-----------------------|----|-----------------------|-----------------------|
| 3-chlorofluoranthene           | 3-ClFluor     | 4 | 0.17 | -   | -                     | -                     | 25 | 2.11×10 <sup>-3</sup> | 4.21×10 <sup>-3</sup> |
| 8-chlorofluoranthene           | 8-ClFluor     | 4 | 0.18 | 25  | 1.79×10 <sup>-5</sup> | 3.57×10 <sup>-5</sup> | 75 | 5.53×10 <sup>-4</sup> | 5.98×10 <sup>-4</sup> |
| 1-chloropyrene                 | 1-ClPy        | 4 | 0.1  | 100 | 0.41                  | 0.65                  | 50 | 0.14                  | 0.17                  |
| 3,9,10-trichlorophenanthrene   | 3,9,10-Cl3Phe | 3 | 0.77 | 75  | 8.74×10 <sup>-4</sup> | 1.11×10 <sup>-3</sup> | -  | -                     | -                     |
| 1,3-dichlorofluoranthene       | 1,3-Cl2Fluor  | 4 |      | 50  | 4.61×10 <sup>-3</sup> | 8.58×10 <sup>-3</sup> | 50 | 1.23×10 <sup>-3</sup> | 2.16×10 <sup>-3</sup> |
| 3,8-dichlorofluoranthene       | 3,8-Cl2Fluor  | 4 | 5.7  | 25  | 9.44×10 <sup>-3</sup> | 1.89×10 <sup>-2</sup> | 50 | 0.01                  | 0.01                  |
| 3,6,9-trichlorophenanthrene    | 3,6,9-Cl3Phe  | 3 |      | -   | -                     | -                     | -  | -                     | -                     |
| Dichloropyrene                 | Cl2Py         | 5 |      | 75  | 0.14                  | 0.17                  | 50 | 0.06                  | 0.10                  |
| 3,4-dichlorofluoranthene       | 3,4-Cl2Fluor  | 4 |      | 75  | 0.25                  | 0.35                  | 50 | 0.07                  | 0.11                  |
| 6-chlorochrysene               | 6-ClChry      | 4 | 2.1  | -   | -                     | -                     | -  | -                     | -                     |
| 7-chlorobenz[a]anthracene      | 7-ClBaA       | 4 | 0.83 | 75  | 7.82×10 <sup>-4</sup> | 5.71×10 <sup>-4</sup> | 50 | 8.57×10 <sup>-4</sup> | 1.28×10 <sup>-3</sup> |
| Trichloropyrene                | Cl3Py         | 5 |      | 25  | 0.03                  | 0.06                  | 50 | 0.04                  | 0.05                  |
| 6,12-dichlorochrysene          | 6,12-Cl2Chry  | 4 | 0.03 | -   | -                     | -                     | -  | -                     | -                     |
| 7,12-dichlorobenz[a]anthracene | 7,12-Cl2BaA   | 4 | 0.1  | -   | -                     | -                     | -  | -                     | -                     |
| Tetrachloropyrene              | Cl4Py         | 4 |      | 25  | 0.06                  | 0.11                  | 75 | 0.12                  | 0.11                  |
| Tetrachlorofluoranthene        | Cl4Fluor      | 4 |      | -   | -                     | -                     | 50 | 0.01                  | 0.01                  |

|                          |             |   |      |     |                       |                       |     |                       |                       |
|--------------------------|-------------|---|------|-----|-----------------------|-----------------------|-----|-----------------------|-----------------------|
| 6-chlorobenzo[a]pyrene   | 6-ClBaP     | 5 | 0.09 | 25  | 8.75×10 <sup>-4</sup> | 1.75×10 <sup>-3</sup> | 100 | 0.02                  | 0.01                  |
| Chloroperylene           | ClPery      | 5 |      | -   | -                     | -                     | -   | -                     | -                     |
| Dichlorobenzo[a]pyrene   | Cl2BaP      | 5 |      | 25  | 0.07                  | 0.15                  | 75  | 0.59                  | 0.66                  |
| Dichloroperylene         | Cl2Pery     | 5 |      | -   | -                     | -                     | -   | -                     | -                     |
| Trichlorobenzo[a]pyrene  | Cl3BaP      | 5 |      | -   | -                     | -                     | 50  | 0.06                  | 0.07                  |
| <b>BrPAH</b>             |             |   |      |     |                       |                       |     |                       |                       |
| 2-Bromonaphthalene       | 2-BrNap     | 2 |      | 100 | 0.54                  | 0.19                  | 25  | 3.03×10 <sup>-4</sup> | 6.07×10 <sup>-4</sup> |
| α-Bromonaphthalene       | α-BrNap     | 2 |      | 100 | 1.04                  | 0.49                  | 25  | 7.50×10 <sup>-4</sup> | 1.50×10 <sup>-3</sup> |
| 1,4-Dibromonaphthalene   | 1,4-Br2Nap  | 2 |      | 50  | 6.24×10 <sup>-4</sup> | 7.49×10 <sup>-4</sup> | -   | -                     | -                     |
| 2,7-Dibromonaphthalene   | 2,7-Br2Nap  | 2 |      | -   | -                     | -                     | -   | -                     | -                     |
| 9-Bromofluorene          | 9-BrFlu     | 3 |      | -   | -                     | -                     | -   | -                     | -                     |
| 2-Bromofluorene          | 2-BrFlu     | 3 | 0.02 | 25  | 1.25×10 <sup>-4</sup> | 2.50×10 <sup>-4</sup> | -   | -                     | -                     |
| 9-Bromophenanthrene      | 9-BrPhe     | 3 | 0.02 | 25  | 2.50×10 <sup>-4</sup> | 5.00×10 <sup>-4</sup> | -   | -                     | -                     |
| 9-Bromoanthracene        | 9-BrAnt     | 3 | 0.01 | -   | -                     | -                     | -   | -                     | -                     |
| Bromofluoranthene        | BrFluor     | 4 |      | -   | -                     | -                     | -   | -                     | -                     |
| 9,10-Dibromoanthracene   | 9,10-Br2Ant | 3 |      | 25  | 2.50×10 <sup>-4</sup> | 5.00×10 <sup>-4</sup> | -   | -                     | -                     |
| 1-Bromopyrene            | 1-BrPy      | 4 | 0.04 | 75  | 0.80                  | 1.30                  | 50  | 0.25                  | 0.33                  |
| 7-Bromobenz[a]anthracene | 7-BrBaA     | 4 | 0.84 | -   | -                     | -                     | -   | -                     | -                     |

|                               |             |   |       |    |      |      |    |                       |                       |
|-------------------------------|-------------|---|-------|----|------|------|----|-----------------------|-----------------------|
| Dibromopyrene                 | Br2Py       | 4 |       | 50 | 0.21 | 0.35 | 50 | 0.76                  | 0.89                  |
| 7,11-Dibromobenz[a]anthracene | 7,11-Br2BaA | 4 | 0.06  | -  | -    | -    | -  | -                     | -                     |
| 7,12-Dibromobenz[a]anthracene | 7,12-Br2BaA | 4 | 0.09  | -  | -    | -    | -  | -                     | -                     |
| 4,7-Dibromobenz[a]anthracene  | 4,7-Br2BaA  | 4 | 0.77  | -  | -    | -    | 25 | 1.25×10 <sup>-4</sup> | 2.50×10 <sup>-4</sup> |
| 5,7-Dibromobenz[a]anthracene  | 5,7-Br2BaA  | 4 | 0.02  | -  | -    | -    | 25 | 1.25×10 <sup>-4</sup> | 2.50×10 <sup>-4</sup> |
| 6-Bromobenzo[a]pyrene         | 6-BrBaP     | 5 | 0.002 | -  | -    | -    | -  | -                     | -                     |
| Tetrabromopyrene              | Br4Py       | 4 |       | -  | -    | -    | -  | -                     | -                     |
| Dibromobenzo[a]pyrene         | Br2BaP      | 5 |       | -  | -    | -    | -  | -                     | -                     |
| Tribromobenzo[a]pyrene        | Br3BaP      | 5 |       | -  | -    | -    | -  | -                     | -                     |

---

SD: standard deviation

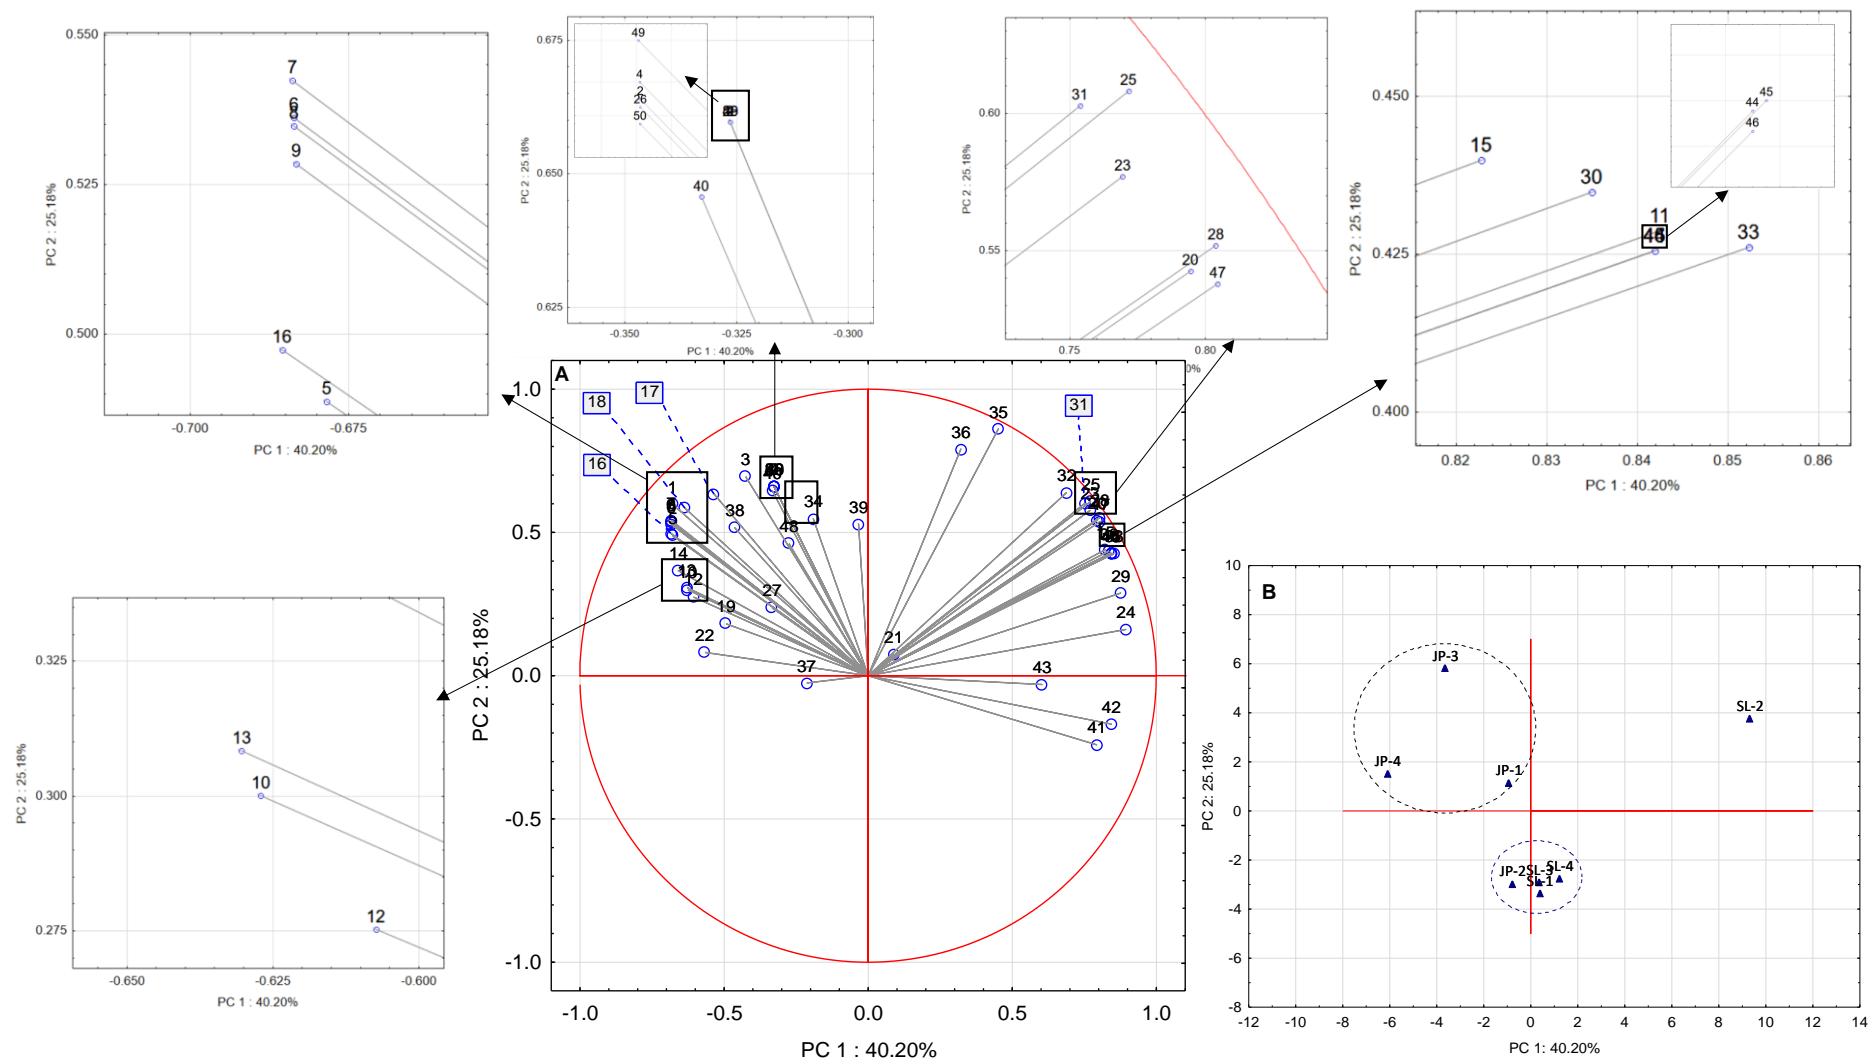

Figure S1. Principal component analysis showing the clustering of different samples from Sri Lanka and Japan with different halogenated PAH and parent PAH congeners. The (A) refers to distribution of different PAH and HPAH compounds in the first

two principal components and (B) denotes clustering of different milk powder samples based upon principal scores. Zero concentration (not detected) congeners were not used for analysis. Different numbers denotes different compounds. Where, 1 – Ace; 2–Flu; 3 – Phe; 4 – Ant; 5 – Fluor; 6 – Py; 7 – BcPhe; 8 – BaA; 9 – Chry; 10 - BbF+BjF; 11 - 7,12-DMBaA; 12 – BkF; 13 – BeP; 14 – BaP; 15 - 3-MECA; 16 – IDP; 17 – DbahA; 18 – BghiP; 19 – DbalP; 20 - 9-ClPhe; 21 - 1-ClAnt+2-ClAnt; 22 - 9-ClAnt; 23 - 3,9-Cl2Phe; 24 - 9,10-Cl2Ant+1,9-Cl2Phe; 25 - 9,10-Cl2Phe; 26 - 3-ClFluor; 27 - 8-ClFluor; 28 - 1-ClPy; 29 - 3,9,10-Cl3Phe; 30 - 1,3-Cl2Fluor; 31 - 3,8-Cl2Fluor; 32 - Cl2Py; 33 - 3,4-Cl2Fluor; 34 - 7-ClBaA; 35 - Cl3Py; 36 - Cl4Py; 37 - Cl4Fluor; 38 - 6-ClBaP; 39 - Cl2Bap; 40 - Cl3Bap; 41 - 2-BrNap; 42 -  $\alpha$ -BrNap; 43 - 1,4-Br2Nap; 44 - 2-BrFlu; 45 - 9-BrPhe; 46 - 9,10-Br2Ant; 47 - 1-BrPy; 48 - Br2Py; 49 - 4,7-Br2BaA; 50 - 5,7-Br2BaA.

Table S3. TEQ values calculated from corresponding TEF (for PAHs) or REP (for HPAHs) values for the milk powder samples from Sri Lanka and Japan. Results represented as ng-TEQ/teaspoon of milk powder dry weight.

| Congeners | TEF or REP | Sri Lanka |      |      |      | Japan    |      |          |          |
|-----------|------------|-----------|------|------|------|----------|------|----------|----------|
|           |            | SL-1      | SL-2 | SL-3 | SL-4 | JP-1     | JP-2 | JP-3     | JP-4     |
| Ace       | 0.001      | 0         | 0    | 0    | 0    | 0        | 0    | 0.00045  | 0.000547 |
| Fl        | 0.001      | 0         | 0    | 0    | 0    | 0        | 0    | 0.002019 | 0        |
| Phe       | 0.001      | 0         | 0    | 0    | 0    | 0        | 0    | 0.013092 | 0.000953 |
| Ant       | 0.01       | 0         | 0    | 0    | 0    | 0        | 0    | 0.03303  | 0        |
| Fluor     | 0.001      | 0         | 0    | 0    | 0    | 0        | 0    | 0.004779 | 0.016269 |
| Py        | 0.001      | 0         | 0    | 0    | 0    | 0        | 0    | 0.005856 | 0.01381  |
| BaA       | 0.1        | 0         | 0    | 0    | 0    | 0        | 0    | 0.113113 | 0.198627 |
| Chry      | 0.01       | 0         | 0    | 0    | 0    | 0        | 0    | 0.01052  | 0.01897  |
| BbF       | 0.1        | 0         | 0    | 0    | 0    | 0.017072 | 0    | 0.012967 | 0.101856 |
| BjF+BkF   | 0.1        | 0         | 0    | 0    | 0    | 0.014407 | 0    | 0.003542 | 0.042777 |
| BaP       | 1          | 0         | 0    | 0    | 0    | 0.216629 | 0    | 0.257125 | 1.222108 |



|                             |      |                       |                      |          |          |          |                       |                      |                       |
|-----------------------------|------|-----------------------|----------------------|----------|----------|----------|-----------------------|----------------------|-----------------------|
| IP                          | 0.1  | 0                     | 0                    | 0        | 0        | 0.061853 | 0                     | 0.045743             | 0.114693              |
| DBahA                       | 1    | 0                     | 0                    | 0        | 0        | 0.09707  | 0                     | 0.080304             | 0.051289              |
| BghiP                       | 0.01 | 0                     | 0                    | 0        | 0        | 0.005152 | 0                     | 0.003714             | 0.004872              |
| 9-ClPhe                     | 0.03 | 0                     | 0.003928             | 0        | 0        | 0        | 0                     | 0.000651             | 0                     |
| 1-ClAnt+2-ClAnt             | 0.1  | 0.000111              | 0.000501             | 0        | 0        | 0        | 0.001407              | 0.000631             | 0                     |
| 9-ClAnt                     | 0.03 | 0                     | 0                    | 0        | 0        | 0        | 0.000306              | 0                    | 0.001163              |
| 3,9-Cl2Phe                  | 0.32 | 0.001396              | 0.00722              | 0        | 0        | 0.002224 | 0                     | 0.001812             | 0                     |
| 9,10-Cl2Ant +<br>1,9-Cl2Phe | 0.2  | 0.000576              | 0.005255             | 0.001343 | 0.003169 | 0.000834 | 5.56×10 <sup>-5</sup> | 0.000316             | 0                     |
| 9,10-Cl2Phe                 | 0.16 | 0                     | 0.009166             | 0        | 0        | 0.00126  | 0                     | 0.002094             | 0                     |
| 3-ClFluor5                  | 0.17 | 0                     | 0                    | 0        | 0        | 0        | 0                     | 0.003723             | 0                     |
| 8-ClFluor                   | 0.18 | 3.34×10 <sup>-5</sup> | 0                    | 0        | 0        | 0        | 0.0005                | 0.000501             | 3.34×10 <sup>-5</sup> |
| 1-ClPy                      | 0.1  | 0.001226              | 0.359358             | 0.038807 | 0.023668 | 0.090346 | 0                     | 0.053067             | 0                     |
| 3,9,10-Cl3Phe               | 0.77 | 0.001001              | 0.005005             | 0.000991 | 0        | 0        | 0                     | 0                    | 0                     |
| 3,8-Cl2Fluor                | 5.7  | 0                     | 0.559427             | 0        | 0        | 0.195953 | 0                     | 0.107386             | 0                     |
| 7-ClBaA                     | 0.83 | 0                     | 0.001541             | 0.002595 | 0.002615 | 0        | 0                     | 0.005854             | 0.00154               |
| 6-ClBaP                     | 0.09 | 0                     | 0.000819             | 0        | 0        | 0.007706 | 0.00035               | 0.003274             | 0.005025              |
| 2-BrFl                      | 0.02 | 0                     | 2.6×10 <sup>-5</sup> | 0        | 0        | 0        | 0                     | 0                    | 0                     |
| 9-BrPhe                     | 0.02 | 0                     | 5.2×10 <sup>-5</sup> | 0        | 0        | 0        | 0                     | 0                    | 0                     |
| 1-BrPy                      | 0.04 | 0                     | 0.28434              | 0.02139  | 0.026226 | 0.072095 | 0                     | 0.032864             | 0                     |
| 4,7-Br2BaA                  | 0.77 | 0                     | 0                    | 0        | 0        | 0        | 0                     | 0.001                | 0                     |
| 5,7-Br2BaA                  | 0.02 | 0                     | 0                    | 0        | 0        | 0        | 0                     | 2.6×10 <sup>-5</sup> | 0                     |

Weight of milk powder in a teaspoon = 2.6 g
